# Supplementary material for: NIR luminescence and catalysis of multifarious salen type ytterbium complexes modulated by anions
Source: Royal Society of Chemistry journal article supplement (doi:10.1039/c3dt51556g), 2013-01-01
Supplement: c3dt51556g.pdf [file c3dt51556g.pdf]

## Supplementary Information

### NIR luminescence and catalysis of multifarious salen type ytterbium complexes modulated by anions

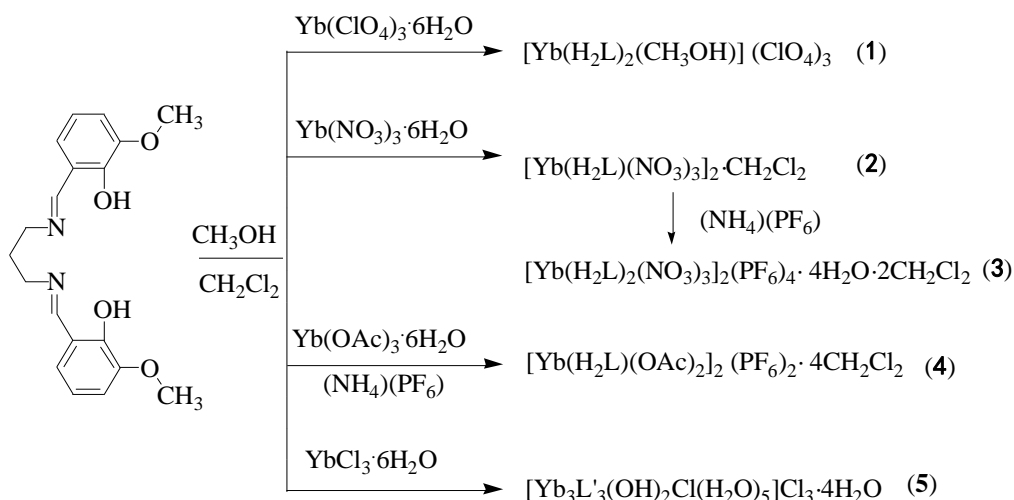

**Scheme 1** Synthesis of complexes 1–5.

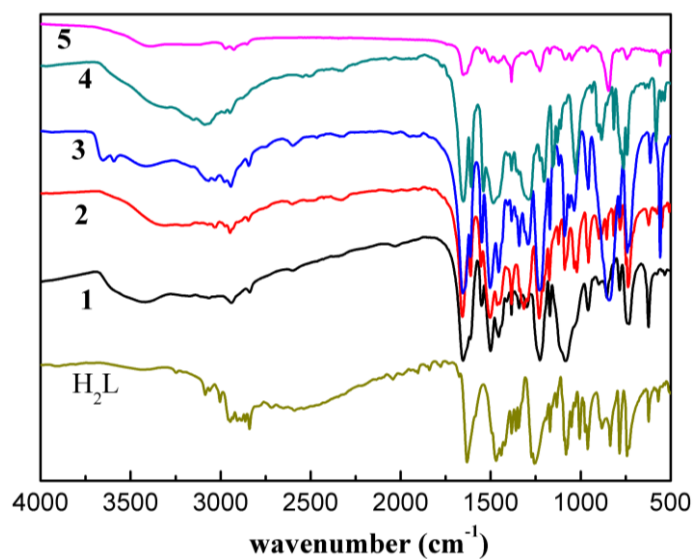

**Fig. S1** Infrared spectra of complexes 1–5.

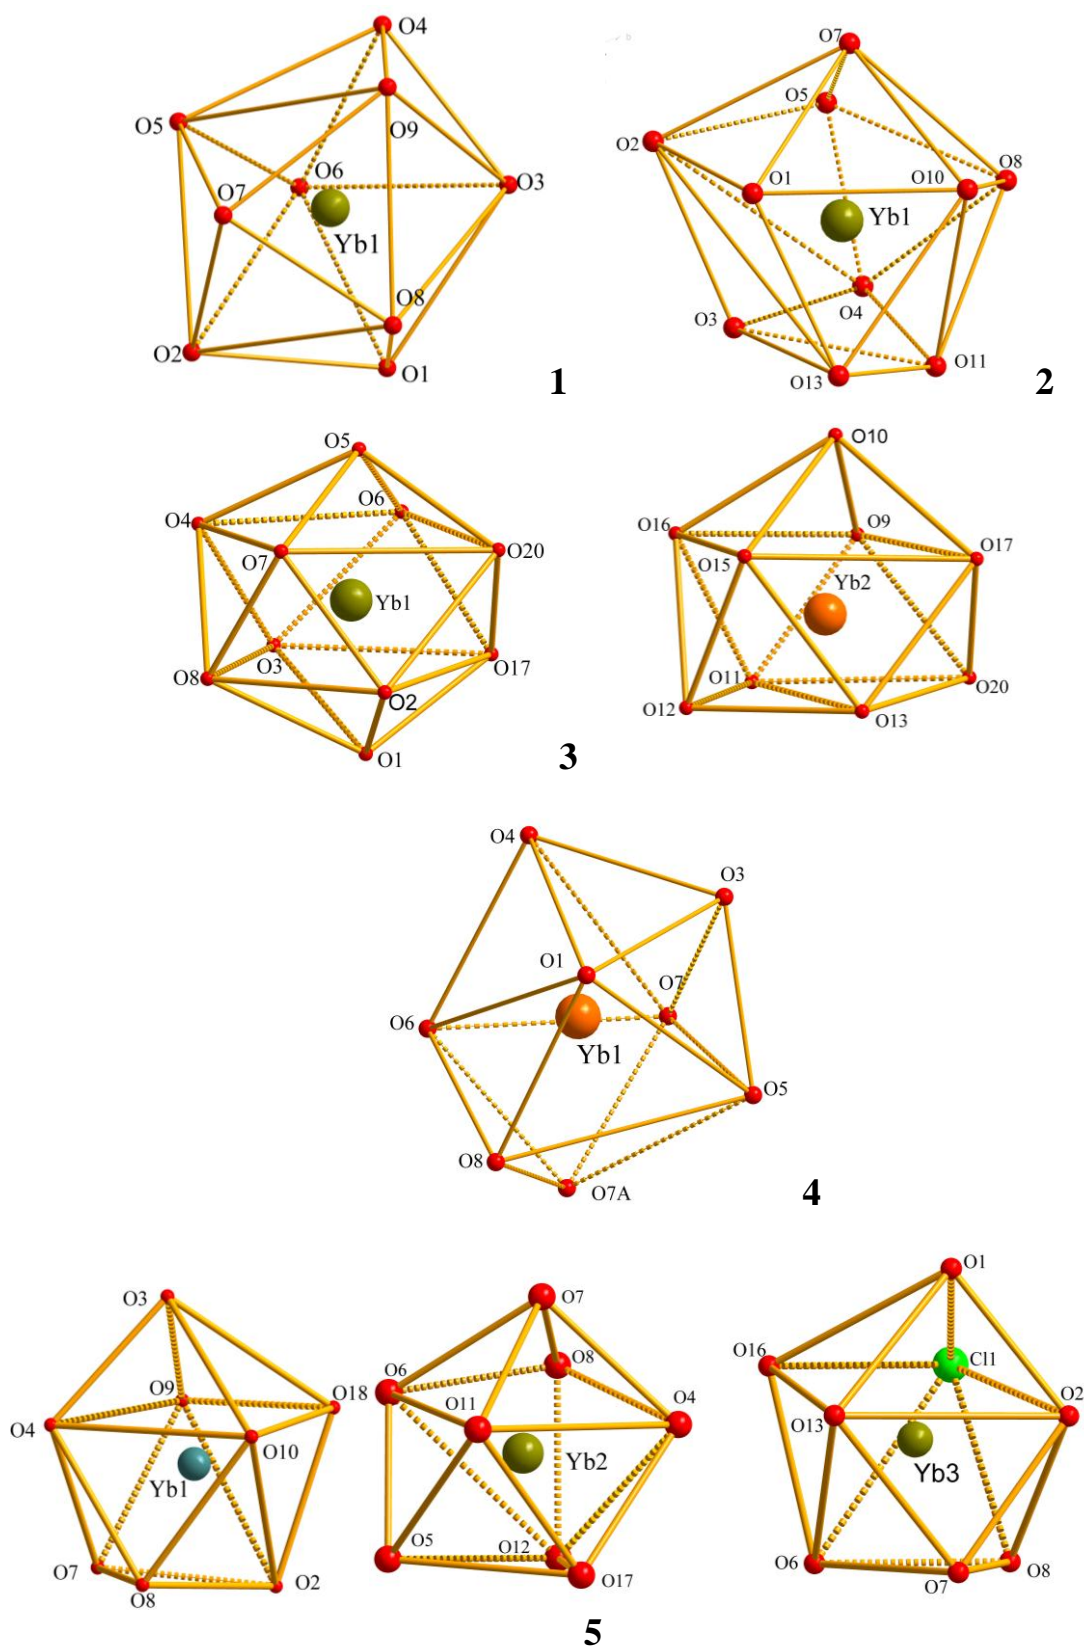

**Fig. S2** The coordination geometry of the Yb(III) ion in complexes 1–5.

**Table S1.** Hydrogen bonds parameters for complex **5** [Å and °]

| D–H···A              | d(D–H) | d(H···A) | D(D···A) | <(DHA) |
|----------------------|--------|----------|----------|--------|
| O(9)–H(9)···Cl(1)    | 0.8475 | 2.3942   | 3.1290   | 140.0  |
| O(8)–H(8)···Cl (2)   | 0.8512 | 2.4942   | 3.2489   | 148.2  |
| O(10)–H(10)···Cl (2) | 0.8528 | 2.2949   | 3.0815   | 153.5  |
| O(12)–H(12)···Cl (2) | 0.8472 | 2.3206   | 3.1395   | 162.7  |
| O(7)–H(7)···Cl (3)   | 0.8530 | 2.4469   | 3.2284   | 152.6  |
| O(11)–H(11)···Cl (3) | 0.8415 | 2.4458   | 3.1463   | 151.9  |
| O(13)–H(13)···Cl (3) | 0.8414 | 2.4325   | 3.1100   | 153.2  |

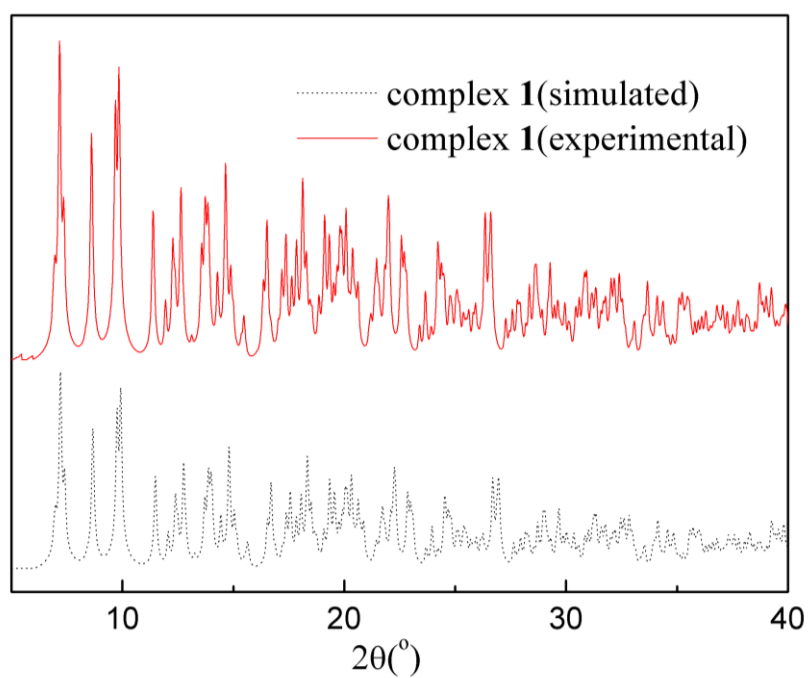

**Fig. S3** X-ray powder diffraction patterns of simulated and experimental for **1**

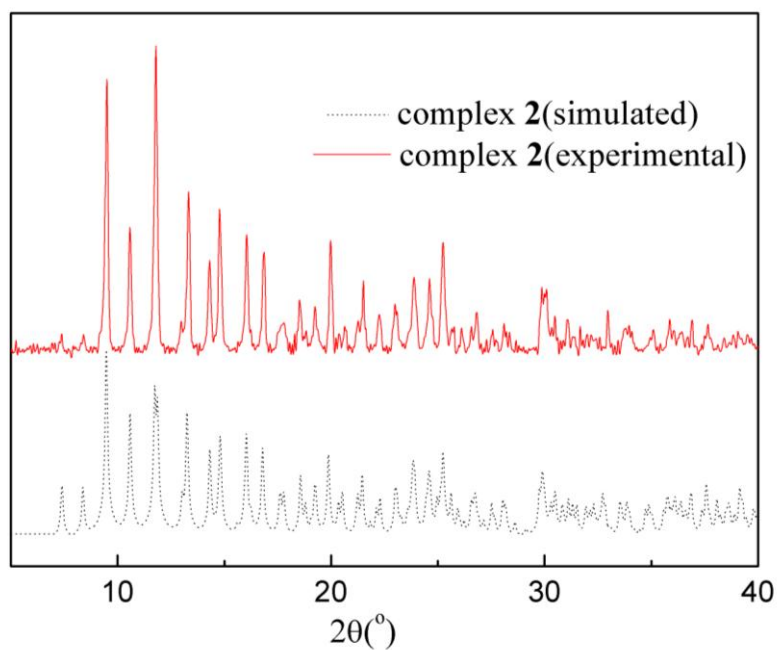

**Fig. S4** X-ray powder diffraction patterns of simulated and experimental for **2**

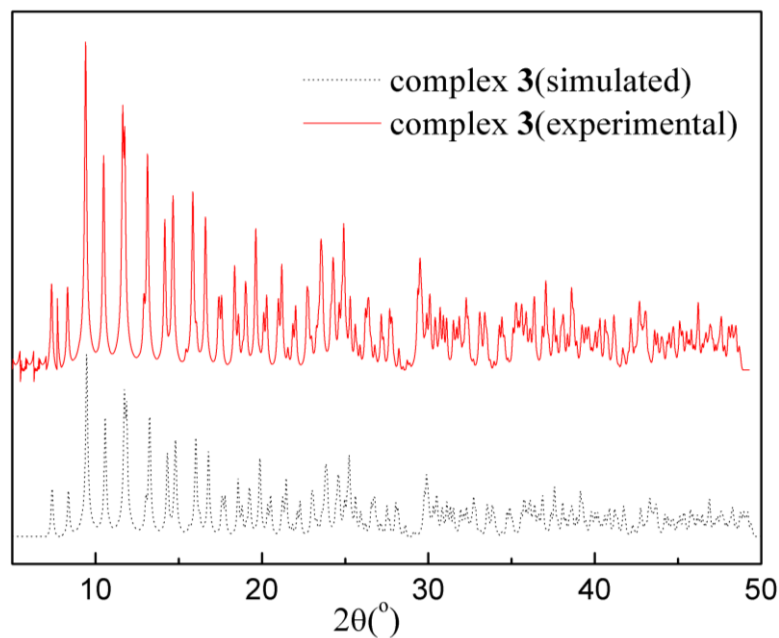

**Fig. S5** X-ray powder diffraction patterns of simulated and experimental for **3**

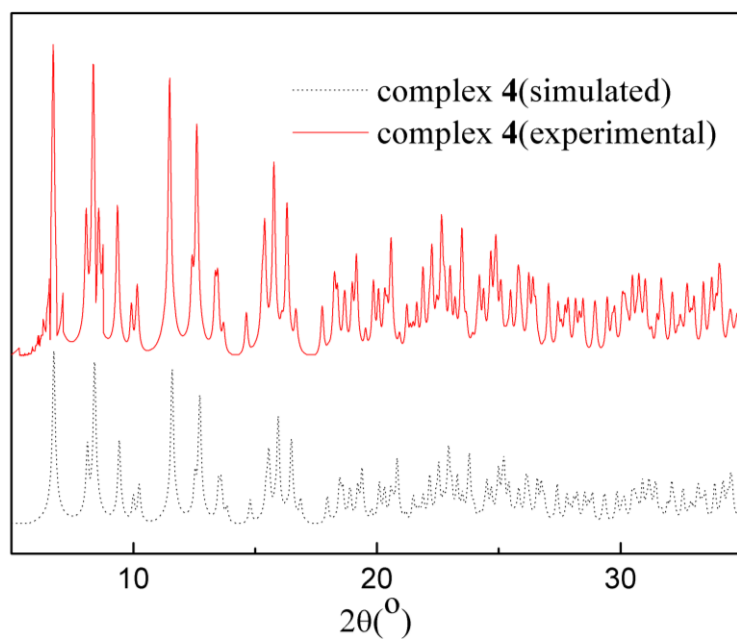

**Fig. S6** X-ray powder diffraction patterns of simulated and experimental for **4**

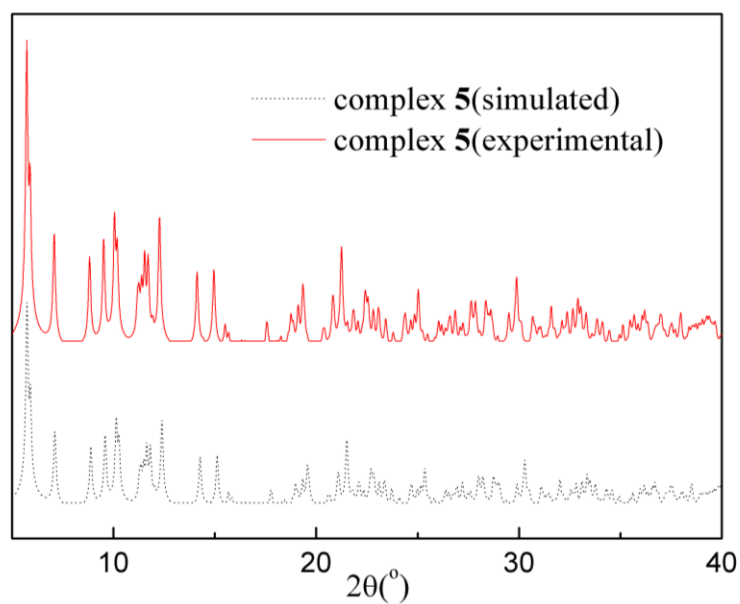

**Fig. S7** X-ray powder diffraction patterns of simulated and experimental for **5**

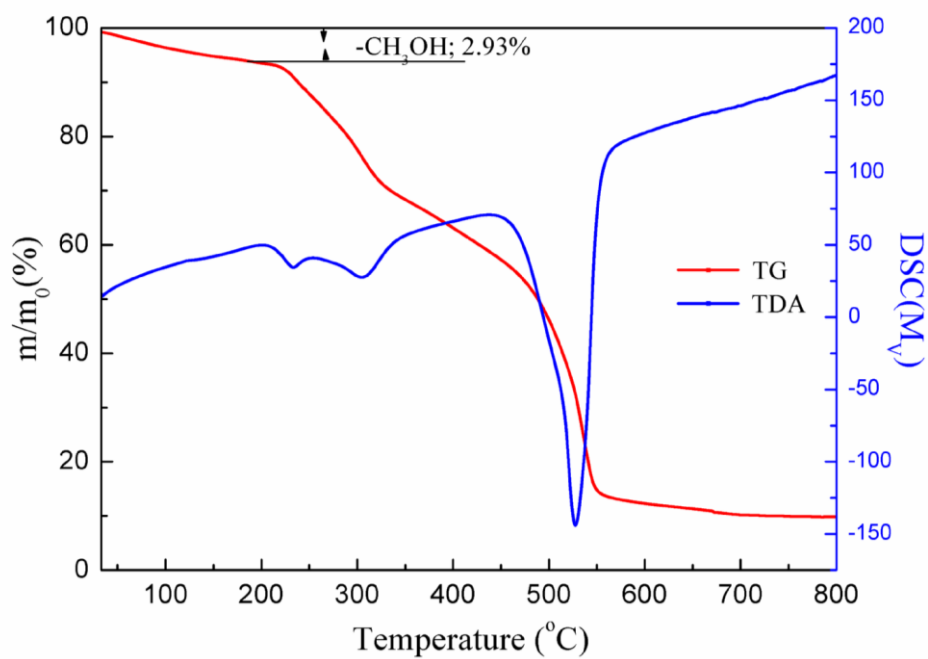

**Fig. S8** Thermogravimetric curve for the complex 1.

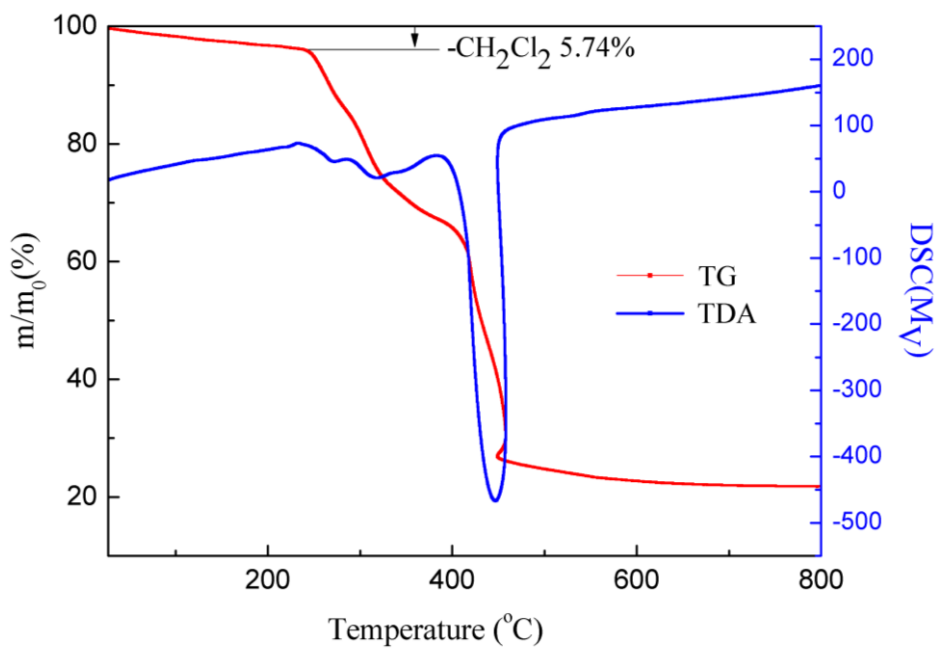

**Fig. S9** Thermogravimetric curve for the complex 2.

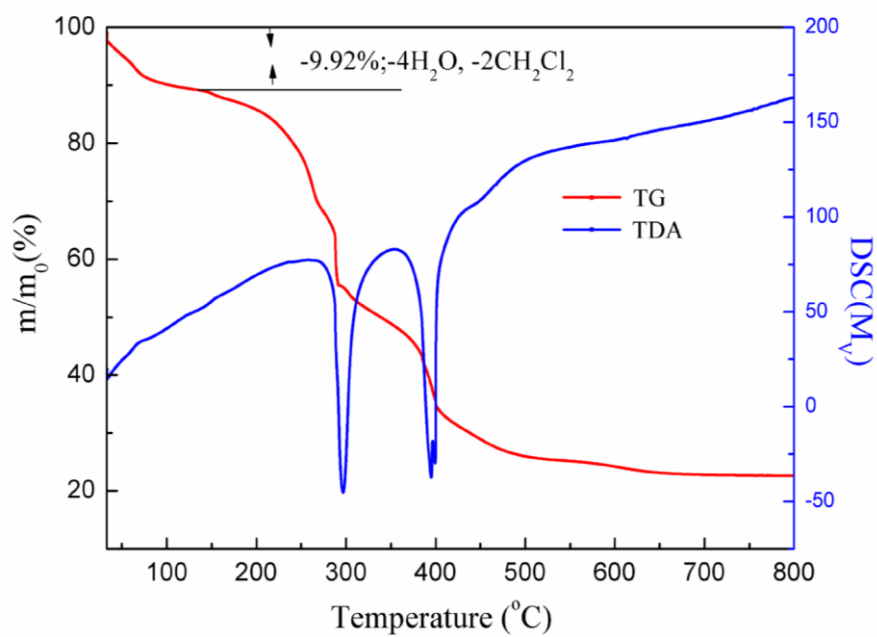

**Fig. S10** Thermogravimetric curve for the complex 3.

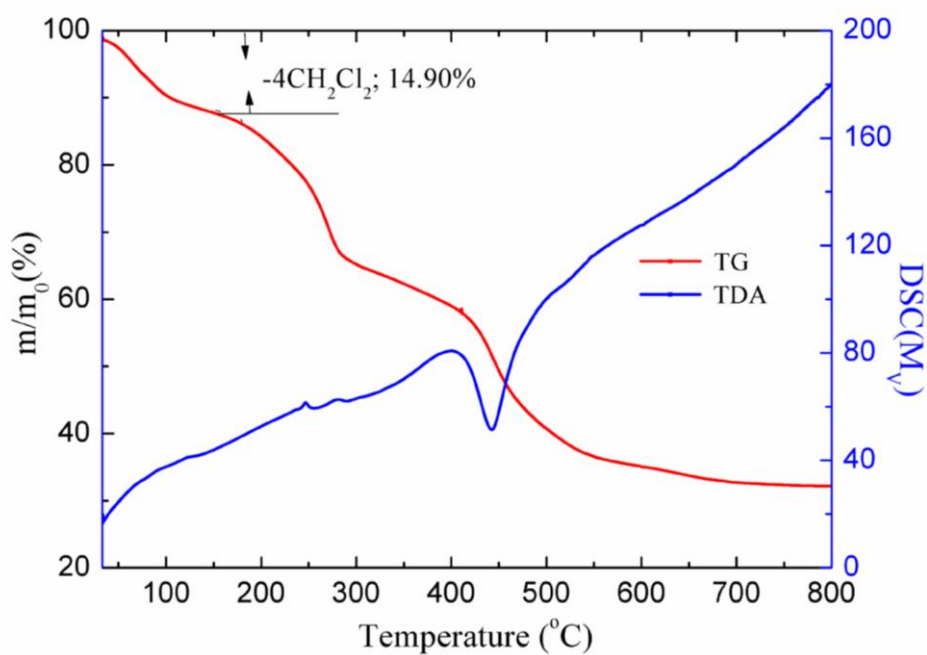

**Fig. S11** TG-DSC curve for the complex 4.

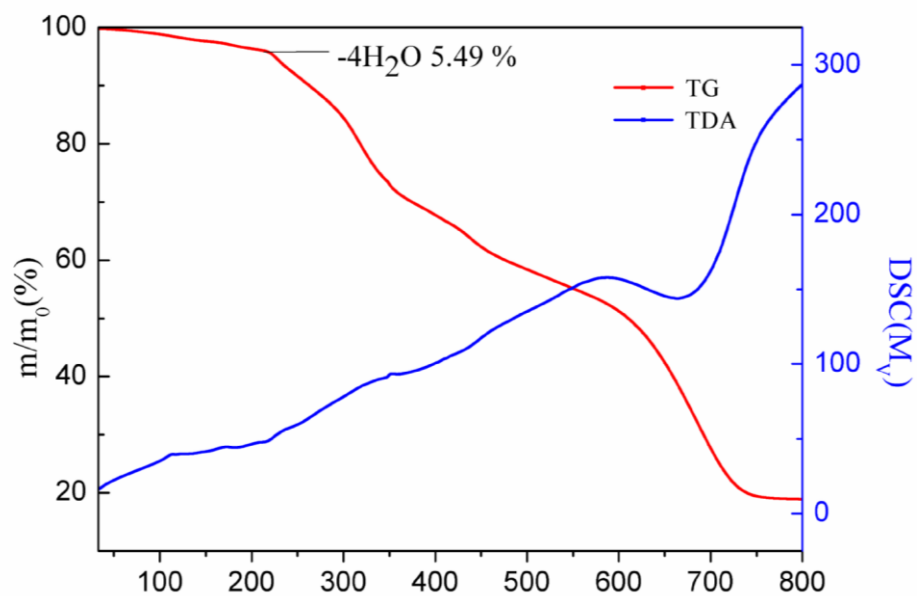

**Fig. S12** Thermogravimetric curve for the complex **5**.

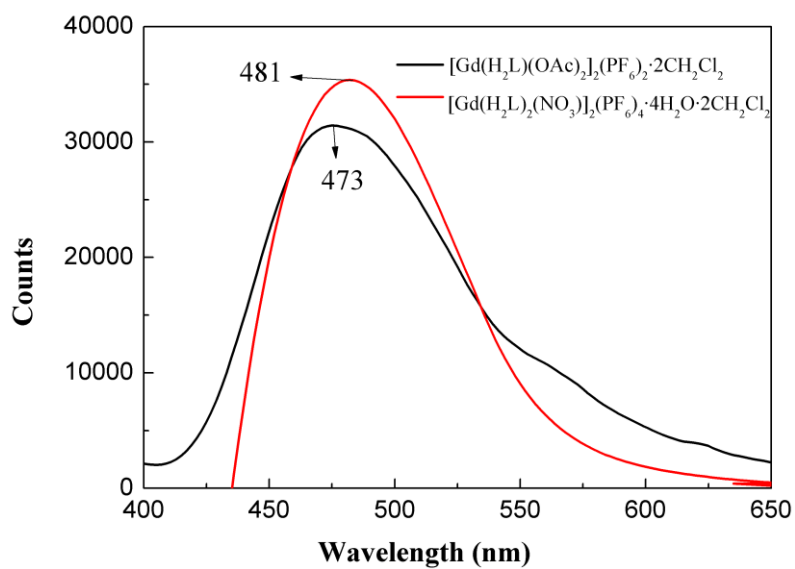

**Fig. S13** Phosphorescence spectrum of complexes  $[\text{Gd}(\text{H}_2\text{L})(\text{OAc})_2]_2(\text{PF}_6)_2 \cdot 6\text{H}_2\text{O}$  and  $\text{Gd}(\text{H}_2\text{L})_2(\text{NO}_3)_2(\text{PF}_6)_4 \cdot 4\text{H}_2\text{O} \cdot 2\text{CH}_2\text{Cl}_2$  at 77K.
